# Sympathoadrenal and Hemodynamic Effects of Isoflurane, Halothane, and Cyclopropane in Dogs

Lawrence B. Perry, M.D.,\* Russell A. Van Dyke, Ph.D.,† Richard A. Theye, M.D.‡

The sympathoadrenal response and its relation to the hemodynamic effects of isoflurane, halothane, and cyclopropane were studied in ten dogs. Each animal was used as its own control. At weekly intervals, the changes in plasma epinephrine and norepinephrine concentrations and in cardiac output ( $\dot{Q}$ ), whole-body oxygen consumption ( $\dot{V}O_2$ ), arterial blood pressure, and heart rate at MAC-1 concentrations of isoflurane, halothane, and cyclopropane were determined. The sympathoadrenal activity, as reflected by plasma values for epinephrine, norepinephrine, and total catecholamines, was the same for isoflurane and halothane, whereas cyclopropane was associated with significant increases in these levels compared with the other two agents. Values reflecting cardiovascular function were also the same for isoflurane and halothane, although  $\dot{Q}$  was significantly lower for halothane than for isoflurane. Cyclopropane was associated with significant increases in cardiovascular function and  $\dot{V}O_2$ . (Key words: Anesthetics, gases: cyclopropane; Anesthetics, volatile: halothane; Anesthetics, volatile: isoflurane; Sympathetic nervous system: volatile anesthetics; Heart: cardiac output; Oxygen: consumption.)

THE SUGGESTION of Price and associates<sup>1,2</sup> that the hemodynamic responses to anesthetic agents can be correlated roughly with their effects upon sympathetic nervous function has not been universally supported by the findings of others.<sup>3-6</sup> We believe these divergent results are related largely to differences in methods and, in particular, to shortcomings in the methods of determining plasma

levels of epinephrine (E) and norepinephrine (NE). The trihydroxyindole (THI) method of catecholamine (CA) analysis, introduced by Lund<sup>7</sup> in 1949, has been modified and improved by others.<sup>8-11</sup> It is limited by errors originating in technical difficulties, and often by a lack of sufficient sensitivity for the detection of small, but physiologically significant, changes occurring in plasma. Recent technical refinements have made the THI method more sensitive and accurate at subnanogram concentrations and have permitted a high degree of reproducibility and reliability of results.<sup>12-14</sup>

We accordingly decided to reinvestigate the suggestion of Price and associates,<sup>1,2</sup> using modern methods of CA analysis. With each animal as its own control, we determined plasma E and NE concentrations, hemodynamic responses, and whole-body oxygen consumption ( $\dot{V}O_2$ ) during isoflurane, halothane, and cyclopropane anesthesia.

## Material and Methods

At weekly intervals, ten unpremedicated and fasted dogs (mean weight,  $17.3 \pm 0.8$  kg) had their tracheas intubated with the aid of succinylcholine (20 mg) and were anesthetized in random sequence with MAC concentrations of isoflurane, halothane, or cyclopropane in  $O_2$  and  $N_2$ , administered through a nonrebreathing system. In addition, a final "awake study" was carried out with the aid of minimal amounts of thiopental 1 hour after completion of the third week of study with an anesthetic agent in each dog.  $F_{IO_2}$  was adjusted to maintain  $P_{aO_2}$  at  $150 \pm 5$  mm Hg, and use of a ventilator (Bird Mark IV/VIII) maintained  $P_{aCO_2}$  at  $40 \pm 2$  mm Hg. Body temperature was maintained at  $37.0 \pm 0.5$  C by external means. Intravenous fluids (5 per cent glucose in distilled water) were given continuously (rate, 4 ml/kg/h).

\* Instructor in Anesthesiology, Mayo Graduate School of Medicine.

† Associate Professor of Biochemistry, Mayo Medical School.

‡ Professor of Anesthesiology, Mayo Medical School.

Received from the Department of Anesthesiology, Mayo Clinic and Mayo Foundation, Rochester, Minnesota 55901. Accepted for publication November 19, 1973. Supported in part by Research Grant HL-4881 from the National Institutes of Health, Public Health Service.

TABLE 1. Comparison of Hemodynamic and Catecholamine Data at Equivalent (MAC-1) Concentrations of Cyclopropane (C), Halothane (H), and Isoflurane (I) and in the "Awake" (A) State

| Variable                             | Cyclopropane |      |             |   |   |      | Halothane |             |   |   |      |      | Isoflurane  |   |   |      |      |             | "Awake" |   |   |   |   |   |
|--------------------------------------|--------------|------|-------------|---|---|------|-----------|-------------|---|---|------|------|-------------|---|---|------|------|-------------|---------|---|---|---|---|---|
|                                      | Mean         | SE   | Difference* |   |   | Mean | SE        | Difference* |   |   | Mean | SE   | Difference* |   |   | Mean | SE   | Difference* |         |   |   |   |   |   |
|                                      |              |      | A           | H | I |      |           | A           | H | I |      |      | A           | H | I |      |      |             |         |   |   |   |   |   |
|                                      |              |      |             |   |   |      |           |             |   |   |      |      |             |   |   |      |      | A           | H       | I | A | H | I | A |
| $\dot{Q}$ (l/min)                    | 4.09         | 0.44 | x           | x | x | 3.22 | 0.36      | x           | x | x | 4.15 | 0.53 | x           | x | x | 1.81 | 0.16 | x           | x       | x |   |   |   |   |
| $\dot{V}_{O_2}$ (ml/min)             | 143          | 9    | x           | x | x | 101  | 3         | x           | x | x | 138  | 9    | x           | x | x | 138  | 9    | x           | x       | x |   |   |   |   |
| Arterial pressure (mean, mm Hg)      | 132          | 3    | x           | x | x | 82   | 4         | x           | x | x | 82   | 4    | x           | x | x | 138  | 9    | x           | x       | x |   |   |   |   |
| Heart rate (beats/min)               | 133          | 12   | x           | x | x | 97   | 6         | x           | x | x | 105  | 7    | x           | x | x | 149  | 12   | x           | x       | x |   |   |   |   |
| Epinephrine (ng/ml plasma)           | 0.85         | 0.14 | x           | x | x | 0.44 | 0.06      | x           | x | x | 0.43 | 0.08 | x           | x | x | 0.80 | 0.14 | x           | x       | x |   |   |   |   |
| Norepinephrine (ng/ml plasma)        | 0.22         | 0.03 | x           | x | x | 0.08 | 0.03      | x           | x | x | 0.11 | 0.04 | x           | x | x | 0.20 | 0.04 | x           | x       | x |   |   |   |   |
| Catecholamines (total, ng/ml plasma) | 1.07         | 0.15 | x           | x | x | 0.52 | 0.07      | x           | x | x | 0.55 | 0.11 | x           | x | x | 1.01 | 0.17 | x           | x       | x |   |   |   |   |

\* Difference between this value and corresponding one in "awake," halothane, isoflurane, or cyclopropane indicates statistically significant difference ( $P > 0.05$ ).

Catheters were placed in the carotid and pulmonary arteries for measurement of pressures, determination of cardiac output ( $\dot{Q}$ ), and sampling of arterial and mixed venous blood. Pressures were transduced by strain gauge. Blood gases were measured by electrodes at 37.0 C. Blood  $O_2$  content was calculated from  $PO_2$  and oxyhemoglobin concentration (IL CO-Oximeter). Cardiac output was determined by the dye-dilution method, indocyanine green having been injected into the pulmonary artery and sampled from the carotid artery. Whole-body  $\dot{V}_{O_2}$  was calculated from measurements of  $\dot{Q}$  and (A-V) $O_2$  by means of the Fick equation. Halothane and isoflurane concentrations were determined by infrared analysis of expired air. Cyclopropane concentrations were estimated from flow rates through calibrated flowmeters. MAC-1 concentrations observed by others<sup>15,16</sup> in the dog for halothane, isoflurane, and cyclopropane, 0.87, 1.48, and 17.5 per cent, respectively, were established and maintained for at least 30 minutes prior to and throughout the period of study. The condition of the "awake" study differed from the above only in that ventilation was spontaneous and the gas mixture was room air.

In each dog during each of the four situations, arterial blood pressure, blood gas concentrations, and heart rate were determined in duplicate, and  $\dot{Q}$  and (A-V) $O_2$  were determined in triplicate. Following these procedures, two 25-ml samples of arterial blood were removed and centrifuged for 3 minutes in a precooled centrifuge (4 C) after 12.5 mg of sodium metabisulfite had been added. The supernatant plasma was removed, frozen in Dry Ice and acetone, and analyzed for E, NE, and total CA content within 24 hours. Studies in this laboratory have demonstrated no significant change in CA content in plasma samples collected and preserved in this manner and frozen for periods as long as 3 weeks.

Our method of CA analysis was that proposed by Valeri and co-workers,<sup>12,14</sup> as modified by G.M. Tyce§ (personal communication). This variant of the THI method involves the separation and purification of catecholam-

§ Mayo Clinic and Mayo Foundation, Rochester, Minnesota.

TABLE 2. Differences in Hemodynamic Variables and Catecholamines among Cyclopropane (C), Halothane (H), and Isoflurane (I) (mean  $\pm$  SE)

| Variable                        | C-H             | C-I             | I-H             |
|---------------------------------|-----------------|-----------------|-----------------|
| $\dot{Q}$ (l/min)               | 1.71 $\pm$ 0.38 | 0.87 $\pm$ 0.38 | 0.84 $\pm$ 0.13 |
| $\dot{V}_{O_2}$ (ml/min)        | 42.9 $\pm$ 9.2  | 41.9 $\pm$ 8.3  | 1.20 $\pm$ 0.47 |
| Arterial pressure (mean, mm Hg) | 50.0 $\pm$ 6.2  | 49.9 $\pm$ 6.2  | 0.40 $\pm$ 6.2  |
| Heart rate (beats/min)          | 35.5 $\pm$ 18.7 | 27.5 $\pm$ 12.9 | 9.0 $\pm$ 6.6   |
| Epinephrine (ng/ml)             | 0.41 $\pm$ 0.14 | 0.42 $\pm$ 0.17 | 0.01 $\pm$ 0.07 |
| Norepinephrine (ng/ml)          | 0.13 $\pm$ 0.03 | 0.10 $\pm$ 0.04 | 0.03 $\pm$ 0.02 |
| Catecholamines (total, ng/ml)   | 0.54 $\pm$ 0.15 | 0.52 $\pm$ 0.20 | 0.03 $\pm$ 0.02 |

TABLE 3. Significance of Differences in Hemodynamic Variables and Catecholamines among Cyclopropane (C), Halothane (H), and Isoflurane (I)

| Variable                            | C-H vs. C-I | C-H vs. I-H | C-I vs. I-H |
|-------------------------------------|-------------|-------------|-------------|
| $\dot{Q}$ (l/min)                   | 1.563*      | 2.166†      | 0.075*      |
| $\dot{V}_{O_2}$ (ml/min)            | 0.081*      | 4.036†      | 4.267†      |
| Arterial pressure (mean, mm Hg)     | 0.011*      | 5.657†      | 5.645†      |
| Heart rate (beats/min)              | 0.352*      | 1.336*      | 1.277*      |
| Epinephrine (ng/ml plasma)          | 0.045*      | 2.562†      | 2.236†      |
| Norepinephrine (ng/ml plasma)       | 0.600*      | 2.777†      | 1.566*      |
| Total catecholamines (ng/ml plasma) | 0.080*      | 2.973†      | 2.280†      |

\* Not significant.

† Significant ( $P < 0.05$ ).‡ Highly significant ( $P < 0.01$ ).

ines from plasma by adsorption with alumina and cation-exchange resin, oxidation with ferricyanide at pH 6.5, tautomerization with NaOH and mercaptoethanol, and fluorimetric separation of E and NE by an Aminco-Bowman spectrophotofluorometer. This method is sensitive enough to detect concentrations of E or NE as low as 0.05 ng/ml, and to measure accurately concentrations of each CA as low as 0.10 ng/ml. By analysis of duplicate samples it has been established that the average deviation of single samples from the mean of their pair is 10 per cent. This figure is larger for concentrations less than 0.30 ng/ml, but for higher values the average deviation is reduced to about 2 per cent. Mean recovery of both catecholamines is  $58 \pm 11$  per cent. Reported values are uncorrected for the percentage recovery.

## Results

Observations pertinent to the four situations studied are summarized in table 1. Data from

the "awake" study have been included for completeness despite our reservations as to whether these data are meaningful. It is of interest, however, that the data for the "awake" state were not significantly different from those for cyclopropane; they were, however, almost always significantly different from those for halothane and isoflurane. With cyclopropane, as compared with both halothane and isoflurane,  $\dot{Q}$ ,  $\dot{V}_{O_2}$ , and arterial pressure were greater, and these values were associated with larger values for plasma E, NE, and total CA. Although the increase in E accounted for the major portion of the difference, both CA's increased by approximately the same relative amount. The findings with halothane and isoflurane were generally similar; the only significant difference was a smaller cardiac output with halothane.

These data were also analyzed by comparing the differences between cyclopropane and halothane, cyclopropane and isoflurane, and isoflurane and halothane. Tables 2 and 3 show the actual differences between groups, and

TABLE 4. Correlation Coefficients ( $r$ ) of Relationship Between Total Plasma Catecholamines and Hemodynamics for Each of Three Anesthetics, and for the Differences Between Them

|              | $\dot{Q}$ | Arterial Pressure | Heart Rate |
|--------------|-----------|-------------------|------------|
| Anesthetic   |           |                   |            |
| Cyclopropane | 0.30      | -0.15             | -0.75*     |
| Halothane    | 0.52      | 0.34              | 0.01       |
| Isoflurane   | 0.75*     | 0.36              | 0.53       |
| Differences  |           |                   |            |
| C-H          | 0.38      | 0.30              | -0.63*     |
| C-I          | 0.20      | 0.10              | -0.41      |
| I-H          | 0.31      | 0.26              | 0.07       |

\* Significant,  $P < 0.05$ .

their statistical significance. These data again show the similarity between isoflurane and halothane, and the significantly higher values for most parameters associated with cyclopropane.

The relationships between each of the hemodynamic variables and plasma catecholamines were sought by determining the correlation coefficients for each anesthetic, and for the differences between anesthetics. No remarkable relationship was found. The few significant correlations were outweighed by the many relationships that were weak or absent (table 4). Although a better correlation between total catecholamines and cardiac output might have been expected, closer examination did not confirm this (fig. 1).

Of particular interest is the wide range in catecholamine concentrations among individual dogs for each anesthetic (table 5).

## Discussion

Interest in the sympathoadrenal response to general anesthesia has persisted since Brewster and associates<sup>17</sup> demonstrated that the hemodynamic effects of diethyl ether in intact dogs could be duplicated by means of an intravenous infusion of epinephrine (1  $\mu\text{g}/\text{kg}/\text{min}$ ). Since then, many investigators have used various analytical techniques and experimental designs to study the sympathoadrenal response to anesthesia.

Deutsch and associates<sup>18</sup> studied the effects of cyclopropane in dogs, and found significant increases (0.7  $\mu\text{g}/\text{l}$ ) in the concentration of E without similar increases in NE. Neither Millar and Morris<sup>3</sup> nor Dobkin and associates<sup>4</sup> however, found significant changes in the concentration of E or NE with cyclopropane in dogs. The differences in results may, perhaps, be due to differences in experimental design, as the latter two groups induced anesthesia with thiopental before administering cyclopropane. Deutsch and associates<sup>18</sup> believe this procedure suppresses the sympathoadrenal response. Our "awake" data are of interest in apparently not supporting this contention, at least with the small doses of thiopental used (mean dose, 100 mg).

TABLE 5. Concentrations (ng/ml) of Free Catecholamines in Arterial Plasma in Response to Isoflurane, Halothane, and Cyclopropane

|        | Epinephrine |           |              | Norepinephrine |           |              |
|--------|-------------|-----------|--------------|----------------|-----------|--------------|
|        | Isoflurane  | Halothane | Cyclopropane | Isoflurane     | Halothane | Cyclopropane |
| Dog 1  | 0.28        | 0.30      | 1.07         | 0.00           | 0.02      | 0.20         |
| Dog 2  | 0.51        | 0.39      | 1.35         | 0.02           | 0.06      | 0.14         |
| Dog 3  | 1.00        | 0.63      | 0.69         | 0.29           | 0.16      | 0.19         |
| Dog 4  | 0.39        | 0.38      | 0.28         | 0.19           | 0.16      | 0.13         |
| Dog 5  | 0.29        | 0.21      | 1.24         | 0.11           | 0.11      | 0.26         |
| Dog 6  | 0.36        | 0.88      | 1.53         | 0.00           | 0.08      | 0.30         |
| Dog 7  | 0.32        | 0.39      | 0.49         | 0.03           | 0.03      | 0.12         |
| Dog 8  | 0.69        | 0.51      | 0.56         | 0.33           | 0.21      | 0.39         |
| Dog 9  | 0.17        | 0.32      | 1.02         | 0.10           | 0.03      | 0.18         |
| Dog 10 | 0.33        | 0.42      | 0.30         | 0.08           | 0.00      | 0.26         |
| MEAN   | 0.43        | 0.44      | 0.85         | 0.11           | 0.08      | 0.22         |

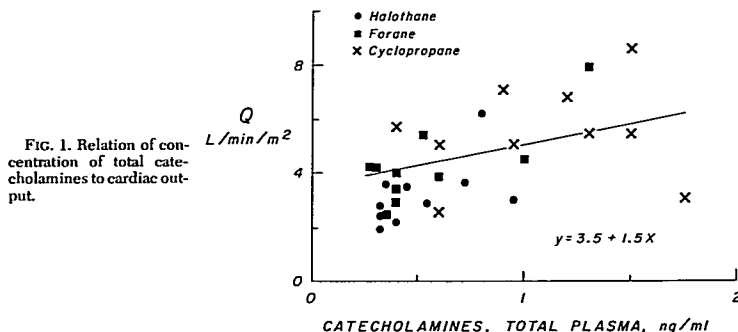

4. Dobkin AB, Byles PH, Neville JF Jr: Neuroendocrine and metabolic effects of general anaesthesia during spontaneous breathing, controlled breathing, mild hypoxia, and mild hypercarbia. *Can Anaesth Soc J* 13:130-171, 1966
5. Ngai SH, Diaz PM, Ozer S: The uptake and release of norepinephrine: Effects of cyclopropane and halothane. *ANESTHESIOLOGY* 31:45-52, 1969
6. Richardson JA, Woods EF, Richardson AK: Plasma concentrations of epinephrine and norepinephrine during anesthesia. *J Pharmacol Exp Ther* 119:378-384, 1957
7. Lund A: Fluorimetric determination of adrenaline in blood. III. A new sensitive and specific method. *Acta Pharmacol Toxicol (Kbh)* 5:231-247, 1949
8. Price HL, Price ML: The chemical estimation of epinephrine and norepinephrine in human and canine plasma. II. A critique of the trihydroxyindole method. *J Lab Clin Med* 50:769-777, 1957
9. Häggendal J: An improved method for fluorimetric determination of small amounts of adrenaline and noradrenaline in plasma and tissues. *Acta Physiol Scand* 59:242-254, 1963
10. Anton AH, Sayre DF: A study of the factors affecting the aluminum oxide-trihydroxyindole procedure for the analysis of catecholamines. *J Pharmacol Exp Ther* 138:360-375, 1962
11. Vendsalu A: Studies on adrenaline and noradrenaline in human plasma. *Acta Physiol Scand* 49 suppl 173:1-123, 1960
12. O'Hanlon JF Jr, Campuzano HC, Horvath SM: A fluorometric assay for subnanogram concentrations of adrenaline and noradrenaline in plasma. *Anal Biochem* 34:568-581, 1970
13. Valori C, Renzini V, Brunori CA, et al: An improved procedure for separation of catecholamines from plasma. *Ital J Biochem* 18:394-405, 1969
14. Valori C, Brunori CA, Renzini V, et al: Improved procedure for formation of epinephrine and norepinephrine fluorophors by the trihydroxyindole reaction. *Anal Biochem* 33:158-167, 1970
15. Eger EI II, Brandstater B, Saidman LJ, et al: Equipotent alveolar concentrations of methoxyflurane, halothane, diethyl ether, fluorene, cyclopropane, xenon and nitrous oxide in the dog. *ANESTHESIOLOGY* 26:771-777, 1965
16. Joas TA, Stevens WC: Comparison of the arrhythmic doses of epinephrine during Forane, halothane, and fluorene anesthesia in dogs. *ANESTHESIOLOGY* 35:48-53, 1971
17. Brewster WR Jr, Isaacs JP, Waing-Andersen T: Depressant effect of ether on myocardium of the dog and its modification by reflex release of epinephrine and nor-epinephrine. *Am J Physiol* 175:399-414, 1953
18. Deutsch S, Linde HW, Price HL: Circulatory and sympathoadrenal responses to cyclopropane in the dog. *J Pharmacol Exp Ther* 135:354-357, 1962
19. Hamelberg W, Sprouse JH, Mahaffey JE, et al: Catechol amine levels during light and deep anesthesia. *ANESTHESIOLOGY* 21:297-302, 1960
20. Price HL, Skovsted P, Pauca AL, et al: Evidence for  $\beta$ -receptor activation produced by halothane in normal man. *ANESTHESIOLOGY* 32:389-395, 1970
21. Byles PH, Dobkin AB, Ferguson JH, et al: Forane (Compound 469): Cross-over comparison with enflurane (Éthrane), halothane, and methoxyflurane in dogs. *Can Anaesth Soc J* 18:376-386, 1971
22. Dobkin AB, Byles PH, Ghanooni S, et al: Clinical and laboratory evaluation of a new inhalation anaesthetic: Forane (Compound 469)  $\text{CHF}_2\text{-O-CHClCF}_2$  (1-chloro-2,2,2-trifluoroethyl difluoromethyl ether). *Can Anaesth Soc J* 18:264-271, 1971
